# Supplementary figures and images for: Associations of Probiotic Fermented Milk (PFM) and Yogurt Consumption with Bifidobacterium and Lactobacillus Components of the Gut Microbiota in Healthy Adults
Source: MDPI journal article supplement (doi:10.3390/nu11030651), 2019-03-18

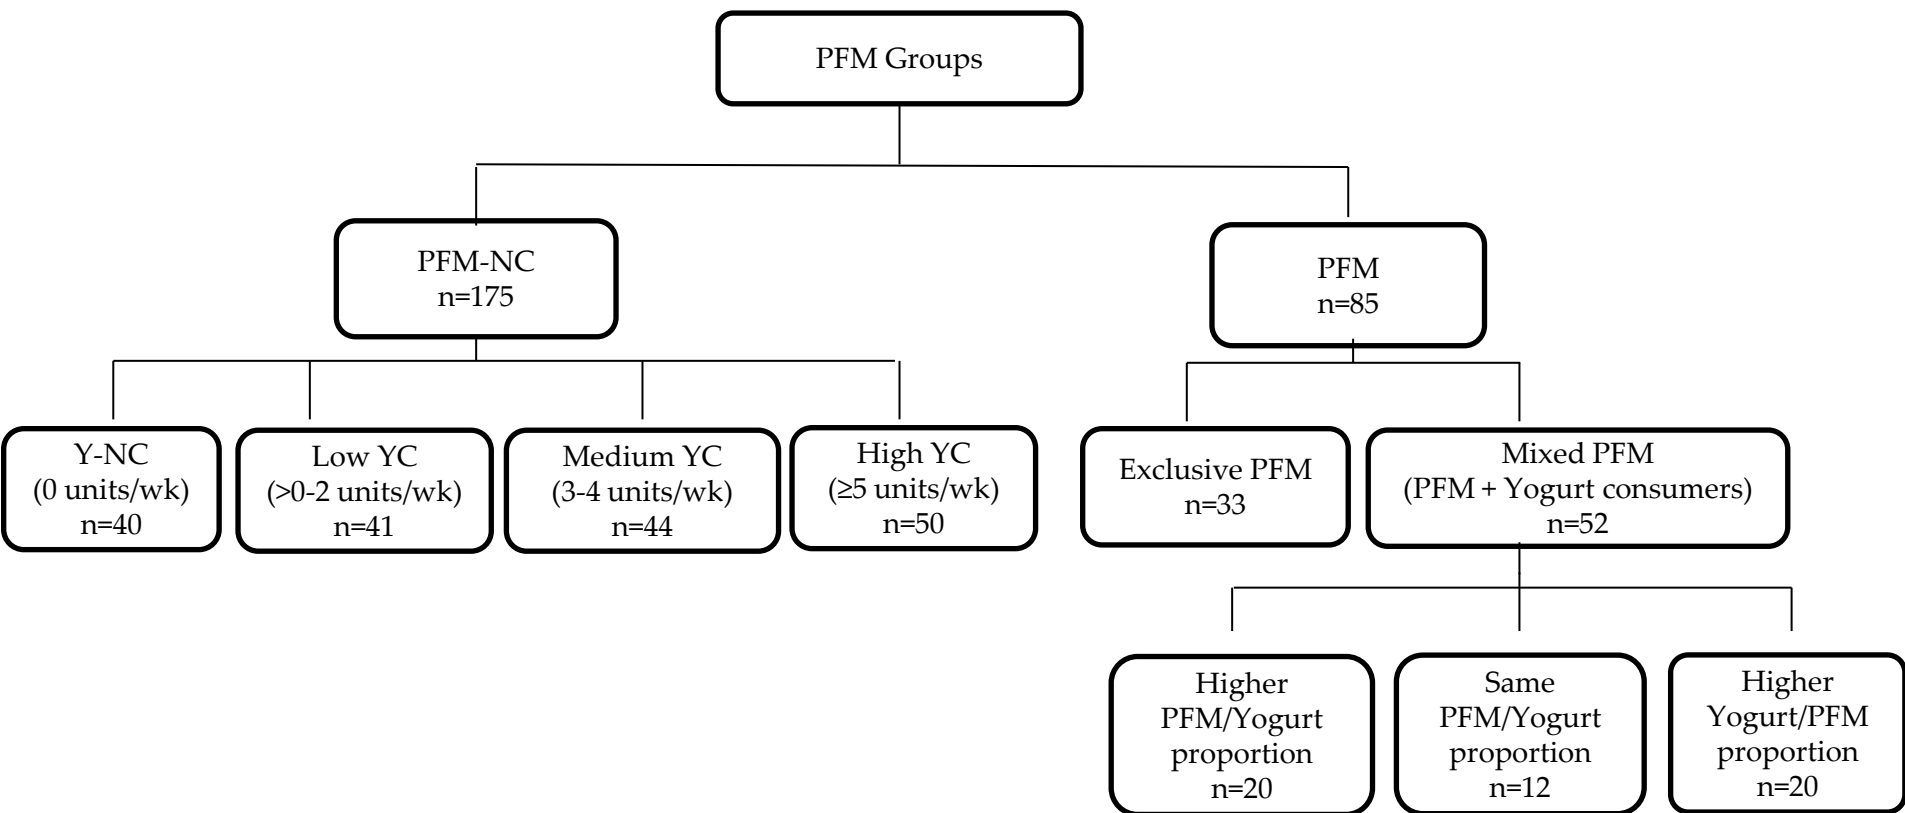

YC: Yogurt consumption  
PFM: Probiotic fermented milks  
NC: Non-consumers  
wk: weeks

Supplement: s2 [file s2]
